# Supplementary material for: Dating the Emergence of Human Endemic Coronaviruses
Source: MDPI journal article supplement (doi:10.3390/v14051095), 2022-05-19

## **Dating the emergence of human endemic coronaviruses**

### **Supplemental Information**

**Table S1.** List of endemic coronavirus strains.

| HCoV-OC43    |                                   |                 |
|--------------|-----------------------------------|-----------------|
| Accession ID | Isolate                           | Collection Date |
| NC_006213    | ATCC VR-759                       | 1967            |
| KY014281     | 2002-04                           | 2002            |
| JN129834     | HK04-01                           | 2004            |
| JN129835     | HK04-02                           | 2004            |
| AY903459     | 87309                             | 2004            |
| AY903460     | 19572 Belgium 2004                | 2004            |
| KY014282     | 2007-09                           | 2007            |
| KY983583     | HCoV_OC43/Seattle/USA/SC2481/2015 | 2015            |
| KY983585     | HCoV_OC43/Seattle/USA/SC2854/2015 | 2015            |
| KY983588     | HCoV_OC43/Seattle/USA/SC3118/2015 | 2015            |
| KY967356     | HCoV_OC43/Seattle/USA/SC2924/2015 | 2015            |
| KY967358     | HCoV_OC43/Seattle/USA/SC2770/2015 | 2015            |
| KY967359     | HCoV_OC43/Seattle/USA/SC2730/2015 | 2015            |
| KY967360     | HCoV_OC43/Seattle/USA/SC2476/2015 | 2015            |
| KY967361     | HCoV_OC43/Seattle/USA/SC2345/2015 | 2015            |
| KY554972     | N07-1541B_433X                    | 2016            |
| KY554973     | N07-1689B_116X                    | 2016            |
| KY554974     | N08-33B_360X                      | 2016            |
| KY554975     | N09-382B                          | 2016            |
| KY674917     | N07-1609B                         | 2016            |
| KY674918     | N07-1647B                         | 2016            |
| KY674920     | N09-595B                          | 2016            |
| KY684759     | HCoV_OC43/Seattle/USA/SC2269/2016 | 2016            |
| KY369905     | HCoV_OC43/Seattle/USA/SC831/2016  | 2016            |
| KY369906     | HCoV_OC43/Seattle/USA/SC622/2016  | 2016            |
| KY369907     | HCoV_OC43/Seattle/USA/SC9741/2016 | 2016            |
| MN306036     | HCoV_OC43/Seattle/USA/SC0682/2019 | 2019            |
| MN306041     | HCoV_OC43/Seattle/USA/SC0810/2019 | 2019            |
| MN306042     | HCoV_OC43/Seattle/USA/SC0839/2019 | 2019            |
| MN306043     | HCoV_OC43/Seattle/USA/SC0841/2019 | 2019            |
| MN306053     | HCoV_OC43/Seattle/USA/SC9430/2018 | 2019            |
| MN310476     | HCoV_OC43/Seattle/USA/SC9428/2018 | 2019            |
| MN310478     | HCoV_OC43/Seattle/USA/SC0776/2019 | 2019            |
| KF530093     | OC43/human/USA/832-27/1983        | 1983            |
| KF530060     | OC43/human/USA/851-15/1985        | 1985            |
| KF530085     | OC43/human/USA/871-25/1987        | 1987            |
| KF530086     | OC43/human/USA/872-5/1987         | 1987            |
| KF530087     | OC43/human/USA/873-6/1987         | 1987            |
| KF530077     | OC43/human/USA/873-16/1987        | 1987            |
| KF530083     | OC43/human/USA/873-19/1987        | 1987            |
| KF530073     | OC43/human/USA/8912-37/1989       | 1989            |
| KF530066     | OC43/human/USA/901-33/1990        | 1990            |
| KF530065     | OC43/human/USA/901-41/1990        | 1990            |

|          |                             |      |
|----------|-----------------------------|------|
| KF530061 | OC43/human/USA/901-43/1990  | 1990 |
| KF530088 | OC43/human/USA/901-54/1990  | 1990 |
| KF530076 | OC43/human/USA/911-11/1991  | 1991 |
| KF530096 | OC43/human/USA/911-38/1991  | 1991 |
| KF530091 | OC43/human/USA/911-58/1991  | 1991 |
| KF530089 | OC43/human/USA/911-66/1991  | 1991 |
| KF530095 | OC43/human/USA/912-6/1991   | 1991 |
| KF530067 | OC43/human/USA/912-10/1991  | 1991 |
| KF530082 | OC43/human/USA/912-11/1991  | 1991 |
| KF530094 | OC43/human/USA/912-36/1991  | 1991 |
| KF530079 | OC43/human/USA/913-29/1991  | 1991 |
| KF530071 | OC43/human/USA/925-1/1992   | 1992 |
| KF530097 | OC43/human/USA/9211-43/1992 | 1992 |
| KF530074 | OC43/human/USA/9212-33/1992 | 1992 |
| KF530090 | OC43/human/USA/931-85/1993  | 1993 |
| KF530059 | OC43/human/USA/951-15/1995  | 1995 |
| KF530084 | OC43/human/USA/951-18/1995  | 1995 |
| KF530062 | OC43/human/USA/952-23/1995  | 1995 |
| KF530075 | OC43/human/USA/953-23/1995  | 1995 |
| KF530098 | OC43/human/USA/965-6/1996   | 1996 |
| KF530064 | OC43/human/USA/9612-9/1996  | 1996 |
| KF530078 | OC43/human/USA/9612-29/1996 | 1996 |
| KF530063 | OC43/human/USA/9612-48/1996 | 1996 |
| KF530099 | OC43/human/USA/971-5/1997   | 1997 |
| KF530072 | OC43/human/USA/9712-13/1997 | 1997 |
| KF530080 | OC43/human/USA/9712-31/1997 | 1997 |
| KF530069 | OC43/human/USA/982-4/1998   | 1998 |
| KF530081 | OC43/human/USA/991-5/1999   | 1999 |
| KF530070 | OC43/human/USA/991-19/1999  | 1999 |
| KF530068 | OC43/human/USA/007-11/2000  | 2000 |
| KF530092 | OC43/human/USA/008-5/2000   | 2000 |
| KF923905 | 229/2005                    | 2005 |
| KF923889 | 1926/2006                   | 2006 |
| KF923899 | 3582/2006                   | 2006 |
| KF923900 | 3647/2006                   | 2006 |
| KF923890 | 39A/2007                    | 2007 |
| KF923892 | 5345/2007                   | 2007 |
| KF923894 | 5352/2007                   | 2007 |
| KF923907 | 5370/2007                   | 2007 |
| KF923921 | 69A/2007                    | 2007 |
| KF923891 | 5240/2007                   | 2007 |
| KF923901 | 5472/2007                   | 2007 |
| KF923908 | 5414/2007                   | 2007 |
| KF923909 | 5442/2007                   | 2007 |
| KF923910 | 5445/2007                   | 2007 |
| KF923911 | 5479/2007                   | 2007 |
| KF923912 | 5484/2007                   | 2007 |
| KF923913 | 5485/2007                   | 2007 |
| KF923914 | 5508/2007                   | 2007 |

|          |                          |      |
|----------|--------------------------|------|
| KF923915 | 5517/2007                | 2007 |
| KF923916 | 5519/2007                | 2007 |
| KF923917 | 5566/2007                | 2007 |
| KF923919 | 5595/2007                | 2007 |
| KF923920 | 5617/2007                | 2007 |
| KF923923 | 892A/2008                | 2008 |
| KF923922 | 8164/2009                | 2009 |
| KP198611 | 1783A/10                 | 2010 |
| KF923886 | 1908A/2010               | 2010 |
| KF923887 | 1997A/2010               | 2010 |
| KF923918 | 10108/2010               | 2010 |
| KP198610 | 2058A/10                 | 2010 |
| KF923893 | 2151A/2010               | 2010 |
| KF923895 | 10285/2010               | 2010 |
| KF923924 | 10290/2010               | 2010 |
| KF923888 | 2145A/2010               | 2010 |
| KF923925 | 10574/2010               | 2010 |
| KX344031 | LRTI_238                 | 2011 |
| KU131570 | HCoV-OC43/UK/London/2011 | 2011 |
| KJ958218 | LY341                    | 2011 |
| KJ958219 | LY342                    | 2011 |
| KF923896 | 3074A/2012               | 2012 |
| KX538964 | MY-U002/12               | 2012 |
| KF923898 | 3184A/2012               | 2012 |
| KF923906 | 3194A/2012               | 2012 |
| KX538965 | MY-U208/12               | 2012 |
| KX538966 | MY-U236/12               | 2012 |
| KF923902 | 12689/2012               | 2012 |
| KF923903 | 12691/2012               | 2012 |
| KF923904 | 12694/2012               | 2012 |
| KX538967 | MY-U413/12               | 2012 |
| KX538968 | MY-U464/12               | 2012 |
| KX538969 | MY-U523/12               | 2012 |
| KF923897 | 3269A/2012               | 2012 |
| KX538970 | MY-U710/12               | 2012 |
| KX538971 | MY-U732/12               | 2012 |
| KX538972 | MY-U774/12               | 2012 |
| KX538973 | MY-U868/12               | 2012 |
| KX538974 | MY-U945/12               | 2012 |
| KX538975 | MY-U1024/12              | 2012 |
| KX538976 | MY-U1057/12              | 2012 |
| KX538977 | MY-U1140/12              | 2012 |
| KX538978 | MY-U1758/13              | 2013 |
| KX538979 | MY-U1975/13              | 2013 |
| MG197718 | YC-55                    | 2015 |
| MG197709 | BJ-112                   | 2015 |
| MG197710 | BJ-124                   | 2015 |
| MG197715 | GZFYF-26                 | 2015 |
| MG197719 | YC-67                    | 2015 |

|           |                               |      |
|-----------|-------------------------------|------|
| MG197720  | YC-68                         | 2015 |
| MG197716  | WZ-303                        | 2015 |
| MG197711  | BJ-164                        | 2015 |
| MG197712  | BJ-165                        | 2015 |
| MG197721  | YC-72                         | 2015 |
| MG197717  | WZ-522                        | 2015 |
| MG197714  | CC-23                         | 2015 |
| MG197713  | BJ-221                        | 2015 |
| MG197722  | YC-207                        | 2015 |
| MG977446  | TNP F1791_2                   | 2016 |
| MF374983  | HCoV-OC43/USA/TCNP_0070/2016  | 2016 |
| MF314143  | HCoV-OC43/USA/ACRI_0052/2016  | 2016 |
| MG197723  | HZ-459                        | 2016 |
| MG977451  | TNP 12636                     | 2016 |
| MG977452  | TNP 12643                     | 2016 |
| MH121121  | HCoV-OC43/USA/ACRI_0213/2016  | 2016 |
| MG977447  | TNP F1832_2                   | 2016 |
| MG977448  | TNP F1833_2                   | 2016 |
| MG977449  | TNP F1834_2                   | 2016 |
| MG977450  | TNP F1835_2                   | 2016 |
| MG977445  | TNP F1790_2                   | 2016 |
| MF374984  | HCoV-OC43/USA/TCNP_00204/2017 | 2017 |
| MG977444  | TNP F1778_2                   | 2017 |
| MF374985  | HCoV-OC43/USA/TCNP_00212/2017 | 2017 |
| MN026165  | OC43_KLF_02_2017              | 2017 |
| MN026164  | OC43_KLF_01_2018              | 2018 |
| NC_003045 | Bovine coronavirus (BCoV-ENT) | 1997 |

#### HCoV-229E

| Accession ID | Isolate                           | Collection Date |
|--------------|-----------------------------------|-----------------|
| NC_002645    | Human coronavirus 229E            | 1962            |
| JX503061     | J0304                             | 2009            |
| JX503060     | 349                               | 2010            |
| KY983587     | HCoV_229E/Seattle/USA/SC3112/2015 | 2015            |
| KY967357     | HCoV_229E/Seattle/USA/SC2872/2015 | 2015            |
| KU291448     | HCoV-229E/BN1/GER/2015            | 2015            |
| KY621348     | HCoV_229E/Seattle/USA/SC379/2016  | 2016            |
| KY674914     | HCoV_229E/Seattle/USA/SC399/2016  | 2016            |
| KY674919     | N08-434B                          | 2016            |
| KY684760     | HCoV_229E/Seattle/USA/SC2282/2017 | 2016            |
| KY369908     | HCoV_229E/Seattle/USA/SC579/2016  | 2016            |
| KY369909     | HCoV_229E/Seattle/USA/SC677/2016  | 2016            |
| KY369910     | HCoV_229E/Seattle/USA/SC1143/2016 | 2016            |
| KY369911     | HCoV_229E/Seattle/USA/SC1212/2016 | 2016            |
| KY369912     | HCoV_229E/Seattle/USA/SC9731/2016 | 2016            |
| KY369913     | HCoV_229E/Seattle/USA/SC1073/2016 | 2016            |

|           |                                                  |      |
|-----------|--------------------------------------------------|------|
| KY369914  | HCoV_229E/Seattle/USA/SC9773/2016                | 2016 |
| MT438696  | HCoV-229E/USA/UNM_0186/2016                      | 2016 |
| MF542265  | 229E/Haiti-1/2016                                | 2016 |
| MN369046  | HCoV_229E/Seattle/USA/SC9724/2018                | 2018 |
| MN306046  | HCoV_229E/Seattle/USA/SC0865/2019                | 2019 |
| KF514429  | 229E/human/USA/892-11/1989                       | 1989 |
| KF514432  | 229E/human/USA/932-72/1993                       | 1993 |
| KF514433  | 229E/human/USA/933-40/1993                       | 1993 |
| KF514430  | 229E/human/USA/933-50/1993                       | 1993 |
| KF514431  | 229E/human/USA/953-49/1995                       | 1995 |
| MT438700  | HCoV-229E/USA/UAMS_DID_0108/2017                 | 2017 |
| MT438697  | HCoV-229E/USA/ACRI_0244/2017                     | 2017 |
| MT438698  | HCoV-229E/USA/ACRI_0256/2017                     | 2017 |
| MT438699  | HCoV-229E/USA/ACRI_0246/2017                     | 2017 |
| MW039392  | HCoV 229E/human/ITA/TE5146/2020                  | 2020 |
| NC_028752 | Camel alphacoronavirus (camel/Riyadh/Ry141/2015) | 2015 |

# HCoV-HKU1

| Accession ID | Isolate                     | Collection Date |
|--------------|-----------------------------|-----------------|
| NC_006577    | HKU1                        | 2004            |
| DQ415896     | N19                         | 2004            |
| DQ415897     | N20                         | 2004            |
| DQ415898     | N21                         | 2004            |
| DQ415899     | N22                         | 2005            |
| DQ415900     | N23                         | 2005            |
| DQ415902     | N25                         | 2005            |
| DQ415903     | N3                          | 2003            |
| DQ415904     | N6                          | 2004            |
| DQ415905     | N7                          | 2004            |
| DQ415906     | N9                          | 2004            |
| DQ415907     | N10                         | 2004            |
| DQ415908     | N11                         | 2004            |
| DQ415909     | N13                         | 2004            |
| DQ415910     | N14                         | 2004            |
| DQ415911     | N15                         | 2004            |
| DQ415912     | N16                         | 2004            |
| DQ415913     | N17                         | 2004            |
| HM034837     | Caen1                       | 2005            |
| KF430201     | HKU1/human/USA/HKU1-18/2010 | 2010            |
| KF430202     | HKU1/human/USA/HKU1-7/2010  | 2010            |
| KF686340     | HKU1/human/USA/HKU1-5/2009  | 2009            |
| KF686341     | HKU1/human/USA/HKU1-10/2010 | 2010            |
| KF686342     | HKU1/human/USA/HKU1-11/2009 | 2009            |
| KF686343     | HKU1/human/USA/HKU1-13/2010 | 2010            |
| KF686344     | HKU1/human/USA/HKU1-15/2009 | 2009            |
| KF686345     | HKU1/human/USA/HKU1-20/2010 | 2010            |
| KF850450     | HKU1 1102                   | 2005            |

|           |                                             |      |
|-----------|---------------------------------------------|------|
| KT779555  | BJ01-p3                                     | 2009 |
| KT779556  | BJ01-p9                                     | 2009 |
| KY674943  | N09-1605B                                   | 2016 |
| KY983584  | SC2628                                      | 2015 |
| MH940245  | SI17244                                     | 2017 |
| MK167038  | SC2521                                      | 2017 |
| NC_012936 | Murine coronavirus (Rat coronavirus Parker) | 1970 |

# HCoV-NL63

| Accession ID | Isolate                     | Collection Date |
|--------------|-----------------------------|-----------------|
| NC_005831    | Amsterdam I                 | 2003            |
| KF530110     | NL63/human/USA/838-9/1983   | 1983            |
| KF530106     | NL63/human/USA/8712-17/1987 | 1987            |
| KF530114     | NL63/human/USA/891-4/1989   | 1989            |
| KF530108     | NL63/human/USA/891-6/1989   | 1989            |
| KF530111     | NL63/human/USA/901-24/1990  | 1990            |
| KF530109     | NL63/human/USA/903-28/1990  | 1990            |
| KF530104     | NL63/human/USA/904-20/1990  | 1990            |
| KF530113     | NL63/human/USA/905-25/1990  | 1990            |
| KF530107     | NL63/human/USA/911-56/1991  | 1991            |
| KF530105     | NL63/human/USA/012-31/2001  | 2001            |
| KF530112     | NL63/human/USA/0111-25/2001 | 2001            |
| JX504050     | NL63/RPTEC/2004             | 2004            |
| JQ765568     | NL63/DEN/2005/193           | 2005            |
| JQ765569     | NL63/DEN/2005/232           | 2005            |
| JQ765570     | NL63/DEN/2005/235           | 2005            |
| JQ765571     | NL63/DEN/2005/271           | 2005            |
| JQ900258     | NL63/DEN/2005/291           | 2005            |
| JQ765572     | NL63/DEN/2005/347           | 2005            |
| JQ900259     | NL63/DEN/2005/449           | 2005            |
| JQ765573     | NL63/DEN/2005/1062          | 2005            |
| JQ900260     | NL63/DEN/2005/1120          | 2005            |
| JQ765574     | NL63/DEN/2005/1862          | 2005            |
| JQ765575     | NL63/DEN/2005/1876          | 2005            |
| JQ765566     | NL63/DEN/2008/16            | 2008            |
| JX104161     | CBJ 037                     | 2008            |
| JX524171     | CBJ123                      | 2009            |
| JQ765565     | NL63/DEN/2009/15            | 2009            |
| JQ900257     | NL63/DEN/2009/31            | 2009            |
| JQ900255     | NL63/DEN/2009/6             | 2009            |
| JQ765564     | NL63/DEN/2009/14            | 2009            |
| JQ900256     | NL63/DEN/2009/22            | 2009            |
| JQ765567     | NL63/DEN/2009/20            | 2009            |
| JQ765563     | NL63/DEN/2009/9             | 2009            |
| MG428702     | Kilifi_HH_3807_11-May-2010  | 2010            |
| MG428699     | Kilifi_HH_5709_19-May-2010  | 2010            |

|           |                                            |      |
|-----------|--------------------------------------------|------|
| MG428704  | Kilifi_HH_5402_20-May-2010                 | 2010 |
| MG428707  | Kilifi_HH_5401_20-May-2010                 | 2010 |
| MG428705  | Kilifi_HH_0522_21-May-2010                 | 2010 |
| MG428706  | Kilifi_HH_3808_24-May-2010                 | 2010 |
| MG428700  | Kilifi_HH_1602_01-Jun-2010                 | 2010 |
| MG428703  | Kilifi_HH_0511_01-Jun-2010                 | 2010 |
| MG428701  | Kilifi_HH_0512_04-Jun-2010                 | 2010 |
| MG772808  | CN0601/14                                  | 2014 |
| KY983586  | HCoV_NL63/Seattle/USA/SC2940/2015          | 2015 |
| KY829118  | N07-262B                                   | 2015 |
| KT381875  | NL63/UF-1/2015                             | 2015 |
| KT266906  | HCoV_NL63/Haiti-1/2015                     | 2015 |
| KX179500  | NL63/UF-2/2015                             | 2015 |
| KU521535  | NL63/UF-2/2015                             | 2015 |
| KY554967  | N06-1144B                                  | 2016 |
| KY554968  | N07-185B                                   | 2016 |
| KY554969  | N07-196B                                   | 2016 |
| KY554970  | N07-324B_182X                              | 2016 |
| KY554971  | N07-468B_176X                              | 2016 |
| KY674915  | N07-6B                                     | 2016 |
| KY674916  | N07-64B                                    | 2016 |
| MN306018  | HCoV_NL63/Seattle/USA/SC0179/2018          | 2018 |
| MN026166  | NL63_KLF_01_2018                           | 2018 |
| MK334044  | ChinaGD03                                  | 2018 |
| MK334047  | ChinaGD04                                  | 2018 |
| MK334045  | ChinaGD05                                  | 2018 |
| MK334043  | ChinaGD02                                  | 2018 |
| MK334046  | ChinaGD01                                  | 2018 |
| MN306040  | HCoV_NL63/Seattle/USA/SC0768/2019          | 2019 |
| DQ445911  | Amsterdam 057                              | 2002 |
| DQ445912  | Amsterdam 496                              | 2003 |
| AY518894  | Amsterdam 496                              | 1988 |
| NC_032107 | NL63-related bat coronavirus (BtKYNL63-9a) | 2010 |

---



**Table S2. Model comparison using BEAST (v.1.10.4) path sampling.**

| HCoV-OC43                  |                    |               |                    |                            |               |                    |                  |        |
|----------------------------|--------------------|---------------|--------------------|----------------------------|---------------|--------------------|------------------|--------|
| Strict Clock               |                    |               |                    | Uncorrelated Relaxed Clock |               |                    |                  |        |
| Model                      |                    | Constant Size | Exponential Growth | Bayesian Skyline           | Constant Size | Exponential Growth | Bayesian Skyline |        |
|                            | Likelihood         | -28557.62     | -28558.62          | -28548.08                  | -28505.56     | -28507.31          | -28503.15        |        |
| Strict Clock               | Constant Size      | -28557.62     | 0                  | 1                          | -9.54         | -52.06             | -50.31           | -54.47 |
|                            | Exponential Growth | -28558.62     | -1                 | 0                          | -10.54        | -53.06             | -51.31           | -55.47 |
|                            | Bayesian Skyline   | -28548.08     | 9.54               | 10.54                      | 0             | -42.52             | -40.77           | -44.93 |
| Uncorrelated Relaxed Clock | Constant Size      | -28505.56     | 52.06              | 53.06                      | 42.52         | 0                  | 1.75             | -2.41  |
|                            | Exponential Growth | -28507.31     | 50.31              | 51.31                      | 40.77         | -1.75              | 0                | -4.16  |
|                            | Bayesian Skyline   | -28503.15     | 54.47              | 55.47                      | 44.93         | 2.41               | 4.16             | 0      |
| HCoV-229E                  |                    |               |                    |                            |               |                    |                  |        |
| Strict Clock               |                    |               |                    | Uncorrelated Relaxed Clock |               |                    |                  |        |
| Model                      |                    | Constant Size | Exponential Growth | Bayesian Skyline           | Constant Size | Exponential Growth | Bayesian Skyline |        |
|                            | Likelihood         | -33495.25     | -33494.30          | -33492.58                  | -33501.80     | -33502.00          | -33500.88        |        |
| Strict                     | Constant Size      | -33495.25     | 0                  | -0.95                      | -2.67         | 6.55               | 6.75             | 5.63   |

|                                   |                           |           |       |       |       |      |      |       |
|-----------------------------------|---------------------------|-----------|-------|-------|-------|------|------|-------|
| <b>Clock</b>                      | <b>Exponential Growth</b> | -33494.30 | 0.95  | 0     | -1.72 | 7.5  | 7.7  | 6.58  |
|                                   | <b>Bayesian Skyline</b>   | -33492.58 | 2.67  | 1.72  | 0     | 9.22 | 9.42 | 8.3   |
| <b>Uncorrelated Relaxed Clock</b> | <b>Constant Size</b>      | -33501.80 | -6.55 | -7.5  | -9.22 | 0    | 0.2  | -0.92 |
|                                   | <b>Exponential Growth</b> | -33502.00 | -6.75 | -7.7  | -9.42 | -0.2 | 0    | -1.12 |
|                                   | <b>Bayesian Skyline</b>   | -33500.88 | -5.63 | -6.58 | -8.3  | 0.92 | 1.12 | 0     |

#### HCoV-NL63

| Strict Clock               |                    |               |                    |                  | Uncorrelated Relaxed Clock |                    |                  |      |
|----------------------------|--------------------|---------------|--------------------|------------------|----------------------------|--------------------|------------------|------|
| Model                      |                    | Constant Size | Exponential Growth | Bayesian Skyline | Constant Size              | Exponential Growth | Bayesian Skyline |      |
|                            | Likelihood         | -4363.63      | -4364.17           | -4366.40         | -4365.32                   | -4366.19           | -4369.26         |      |
| Strict Clock               | Constant Size      | -4363.63      | 0                  | 0.54             | 2.77                       | 1.69               | 2.56             | 5.63 |
|                            | Exponential Growth | -4364.17      | -0.54              | 0                | 2.23                       | 1.15               | 1.99             | 5.09 |
|                            | Bayesian Skyline   | -4366.40      | -2.77              | -2.23            | 0                          | -1.08              | -0.21            | 2.86 |
| Uncorrelated Relaxed Clock | Constant Size      | -4365.32      | -1.69              | -1.15            | 1.08                       | 0                  | 0.87             | 3.94 |
|                            | Exponential Growth | -4366.19      | -2.56              | -1.99            | 0.21                       | -0.87              | 0                | 3.07 |
|                            | Bayesian Skyline   | -4369.26      | -5.63              | -5.09            | -2.86                      | -3.94              | -3.07            | 0    |

Note: A Bayes Factor >3 indicates positive support for the row model. A strong support is usually considered when BF>20.

**Figure S1.** HCoV-NL63 and HCoV-HKU1 timescaled phylogenetic trees. Maximum clade credibility trees estimated for the non-recombinant region of HCoV-NL63 (a) and HCoV-HKU1 (b). Branch lengths represent the evolutionary time measured by the grids corresponding to the timescale shown at the tree base (in years). For internal nodes 95% HPD bars are shown and black dots indicate a posterior probability >0.80 for that node.

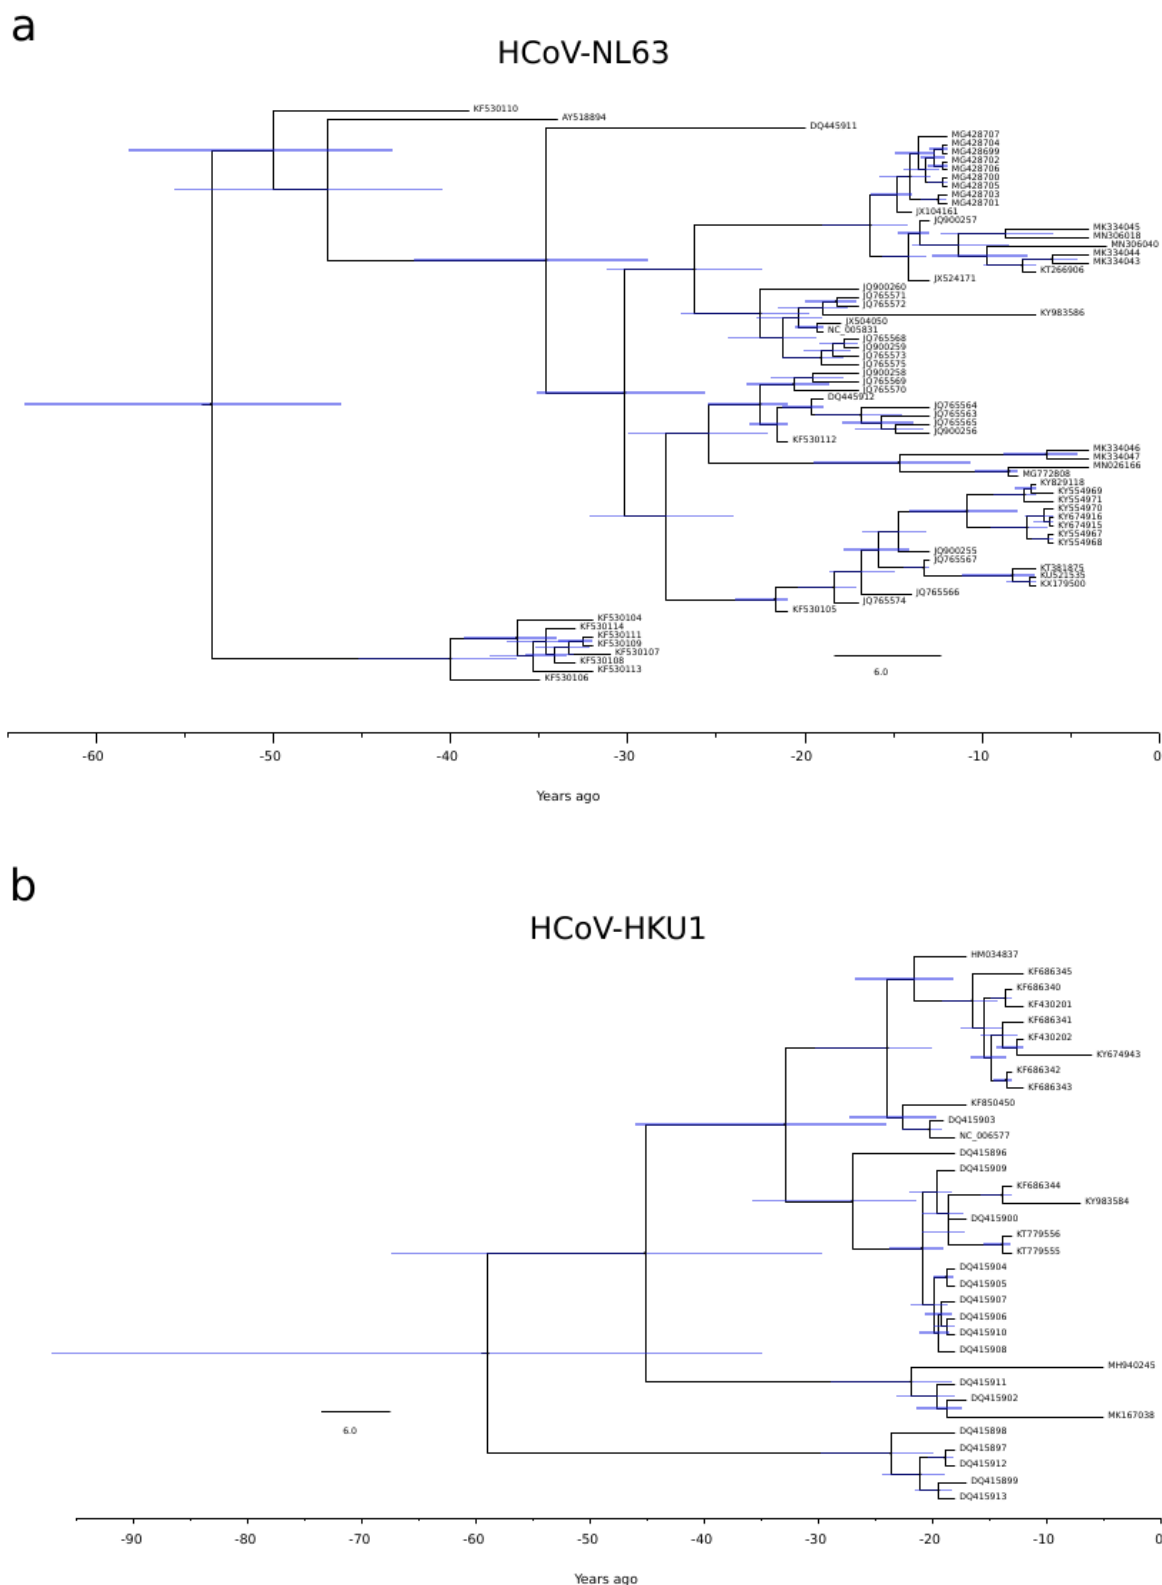

Supplement: s1 [file s1]
